# Supplementary material for: One-Step, In Situ Hydrothermal Fabrication of Cobalt-Doped ZnO/CdS Nanosheets for Optoelectronic Applications
Source: MDPI journal article supplement (doi:10.3390/electronics12051245), 2023-03-05
Supplement: s1 [file s1]

# One-step *In-situ* Hydrothermal Fabrication of Cobalt-doped ZnO/CdS Nanosheets for Optoelectronic Applications

Lakshmiprasad Maddi <sup>1</sup>, Khidhirbrahmendra Vinukonda <sup>2</sup>, Thirumala Rao Gurugubelli <sup>1,\*</sup>  
and Ravindranadh Koutavarapu <sup>3,\*</sup>

<sup>1</sup> Physics Division, Department of Basic Sciences and Humanities, GMR Institute of Technology, Rajam – 532 127, Andhra Pradesh, India

<sup>2</sup> Department of Physics, Sri GCSR Degree College, Rajam – 532 127, Andhra Pradesh, India

<sup>3</sup> Department of Robotics Engineering, College of Mechanical and IT Engineering, Yeungnam University, Gyeongsan 38541, Republic of Korea

\* Correspondence: thirumalaphy@gmail.com (T.R.G.); ravindra\_physicist@ynu.ac.kr (R.K.)

## Materials

Precursors included zinc acetate, NaOH, cadmium acetate, cobalt nitrate and Na<sub>2</sub>S. All of the chemical reagents utilized were AR grade (Merck chemicals). All dilution and sample preparation are done with deionized water and ethanol.

## Characterizations

Powder X-beam diffraction design making use of a PANalytical Xpert Pro-diffractometer and CuK $\alpha$  radiation (1.5406 Å). ZEISS EVO 18 was utilized to obtain morphology of the samples by SEM analysis. HITACHI-H-7600 instrument was utilized to get the TEM micrographs. Tecnai G2 F20 S-Twin electron microscope was used to obtain HRTEM images. A Thermo Scientific K $\alpha$  X-ray source was used for collect X-ray photoelectron spectroscopy. The UV-vis diffuse reflectance spectra were performed on a VARIAN, Cary 5000 spectrophotometer. Photoluminescence study was performed by Jobin Yvon Fluorimeter. The attractive hysteresis circle was made using a Lake Shore 7407 vibrating examination magnetometer (VSM).

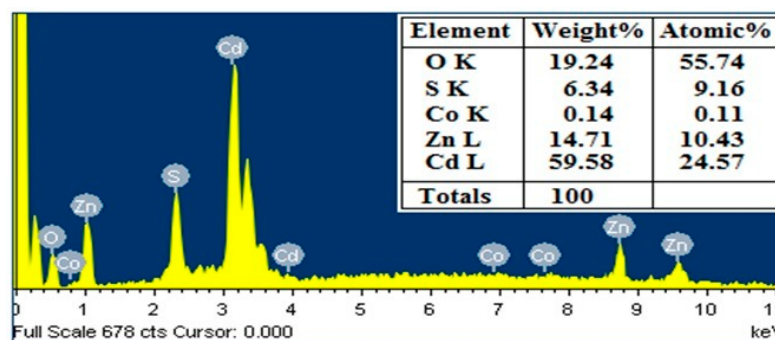

Figure S1. EDS spectrum of Co-doped ZnO/CdS nanosheets.
